# Supplementary material for: Roles of rifampicin in drug-drug interactions: underlying molecular mechanisms involving the nuclear pregnane X receptor
Source: Springer Nature journal article supplement (doi:10.1186/1476-0711-5-3), 2006-01-01
Supplement: 12941_2005_70_MOESM1_ESM.pdf [file 12941_2005_70_MOESM1_ESM.pdf]

Rf

HNF4 $\alpha$  - - - - ->

PXR

CAR

VitD<sub>3</sub>, Dex - - - - ->

Transcriptional regulation

Phase I  
CYP2D6  
CYP2C8  
CYP2C9  
CYP2C19  
CYP3A4

Phase II  
UGTs  
GSTs

Phase III  
 $\beta$ -glycoprotein
