# Supplementary material for: Roles of rifampicin in drug-drug interactions: underlying molecular mechanisms involving the nuclear pregnane X receptor
Source: Springer Nature journal article supplement (doi:10.1186/1476-0711-5-3), 2006-01-01

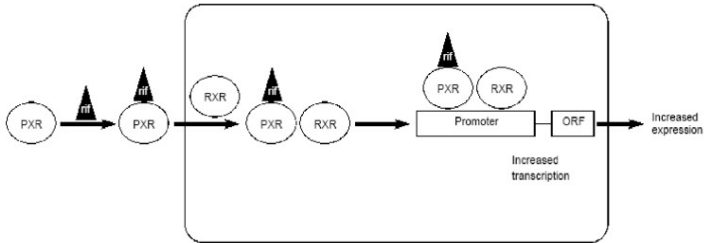

Supplement: 12941_2005_70_MOESM2_ESM.pdf [file 12941_2005_70_MOESM2_ESM.pdf]
